# Supplementary material for: CDC6 may serve as an indicator of lung adenocarcinoma prognosis and progression based on TCGA and GEO data mining and experimental analyses
Source: PubMed Central journal article supplement — Oncol Rep. 2024 Jan 3;51(2):35. doi: 10.3892/or.2024.8694 (PMC10807357; doi:10.3892/or.2024.8694), 2024-01-03
Supplement: Supplementary_Data2.pdf [file Supplementary_Data2.pdf]

**Table SI.** Study population characteristics.

| <b>Dataset ID</b>       | <b>TCGA</b> | <b>GSE31210</b> | <b>GSE118370</b> | <b>GSE72094</b> | <b>GSE30219</b> | <b>GSE68465</b> |
|-------------------------|-------------|-----------------|------------------|-----------------|-----------------|-----------------|
| Tumor tissues, n        | 497         | 226             | 6                | 398             | 85              | 441             |
| Mean age, years<br>± SD | 65.30±9.91  | 59.58±7.40      | n/a              | 69.36±9.45      | 61.49±9.28      | 64.45±10.10     |
| Sex, n (%)              |             |                 |                  |                 |                 |                 |
| Female                  | 266 (53.52) | 121 (53.54)     | -                | 222 (55.78)     | 19 (22.35)      | 219 (49.66)     |
| Male                    | 231 (46.48) | 105 (46.46)     | -                | 176 (44.22)     | 66 (77.65)      | 222 (50.34)     |
| Stage, n (%)            |             |                 |                  |                 |                 |                 |
| 1                       | 276 (55.53) | 168 (74.34)     | -                | 259 (65.08)     | 71 (83.53)      | 371 (84.13)     |
| 2                       | 117 (23.54) | 58 (25.66)      | -                | 67 (16.83)      | 12 (14.12)      | 67 (15.19)      |
| 3                       | 79 (15.90)  | -               | -                | 57 (14.32)      | 2 (2.35)        | 3 (0.68)        |
| 4                       | 25 (5.03)   | -               | -                | 15 (3.77)       | -               | -               |
| Status, n (%)           |             |                 |                  |                 |                 |                 |
| Alive                   | 318 (63.98) | 191 (84.51)     | -                | 285 (71.61)     | 40 (47.06)      | 206 (46.71)     |
| Dead                    | 179 (36.02) | 35 (15.49)      | -                | 113 (28.39)     | 45 (52.94)      | 235 (53.29)     |
| Normal tissues, n       | 54          | 20              | 6                | n/a             | n/a             | n/<br>a         |

n/a, not applicable; TCGA, The Cancer Genome Atlas.
